# Supplementary material
Source: JCI journal article supplement (doi:10.1172/jci130000)
Supplement: sd1 [file 1]

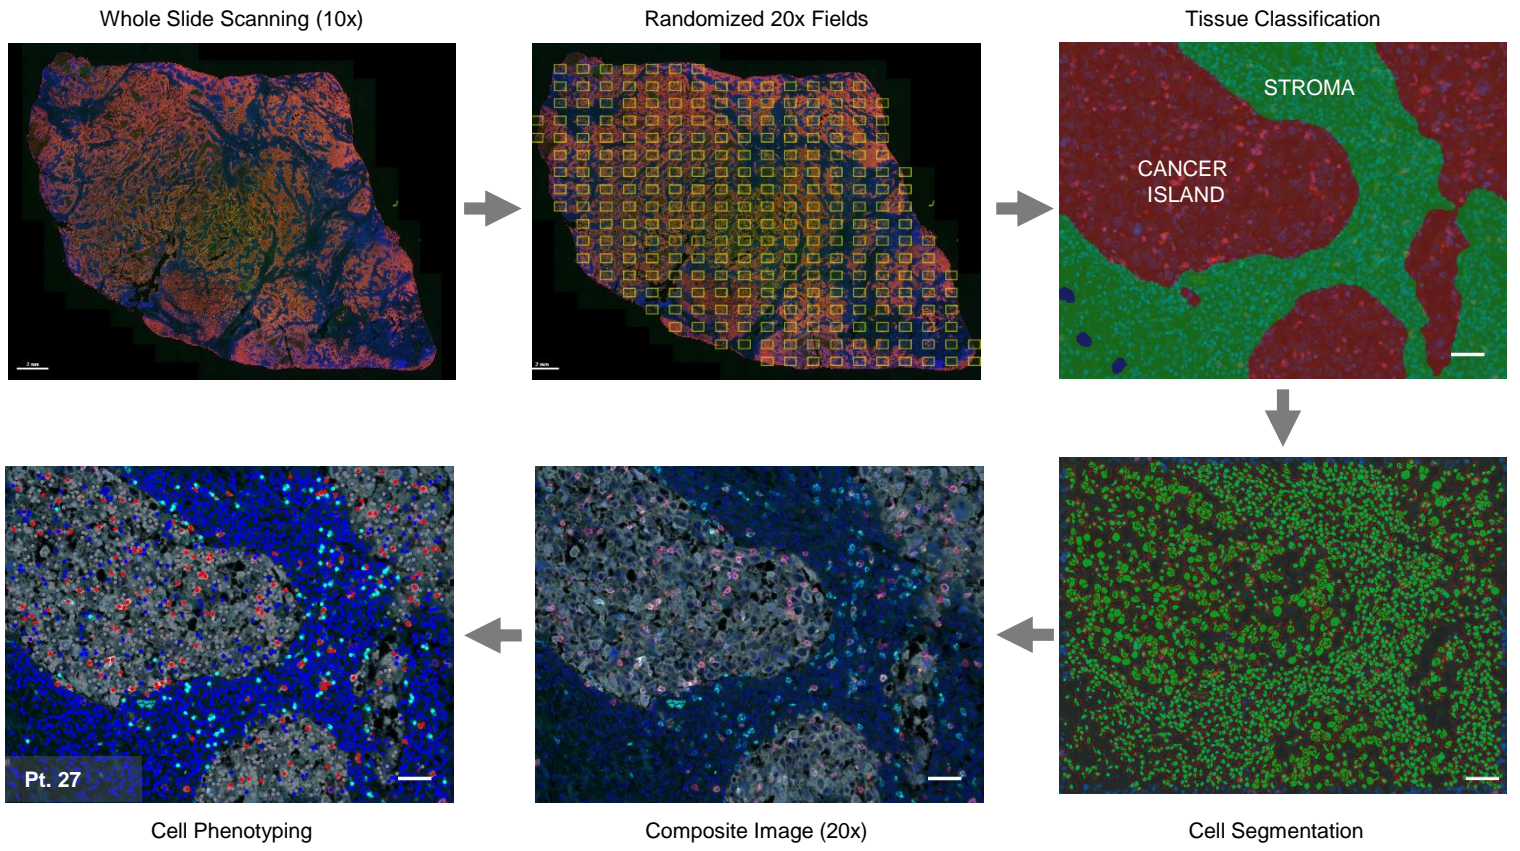

Supplemental Figure 1

Merge: DAPI CD8 CD103 CK

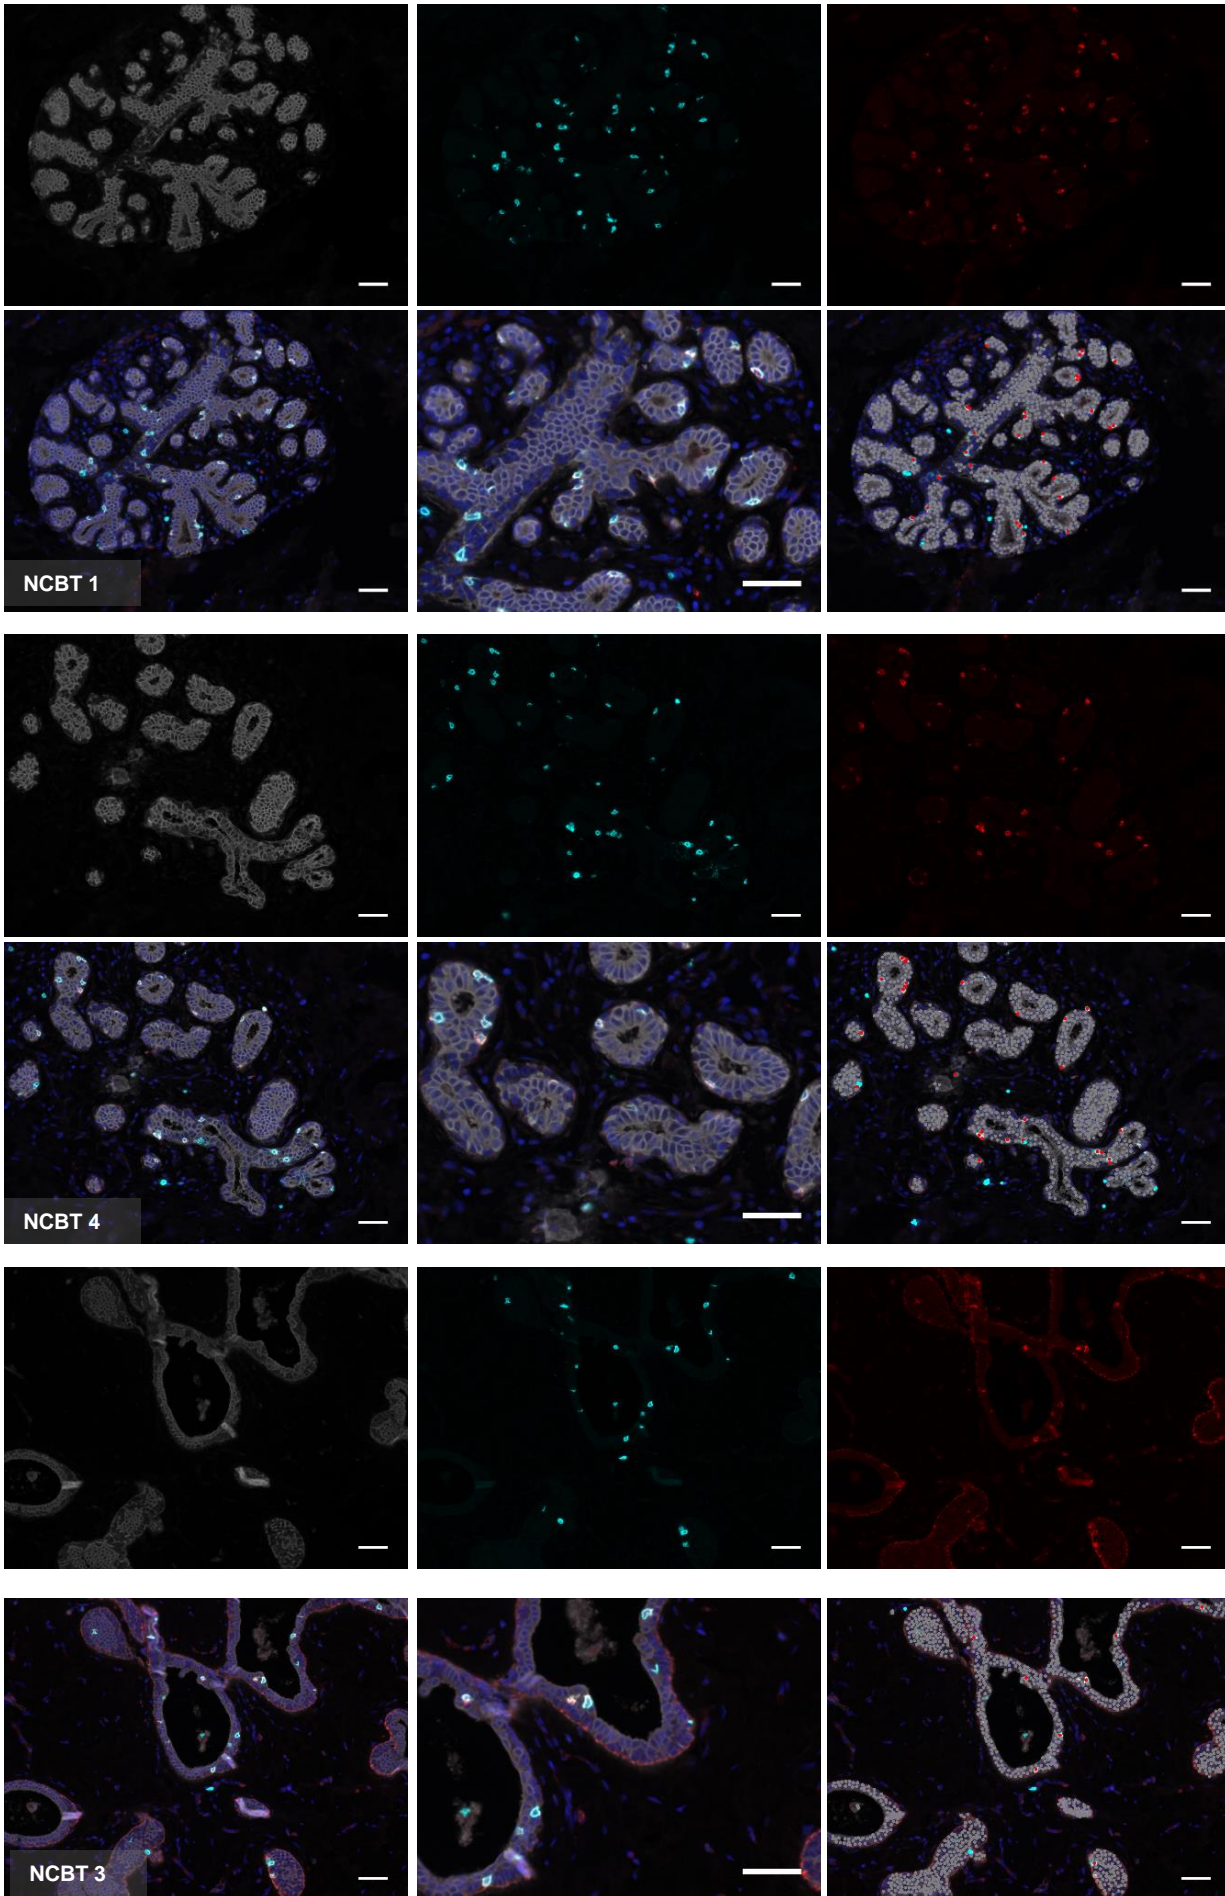

Phenotype: ● CD103+ CD8+ ● CD103- CD8+ ● CK+

Supplemental Figure 2

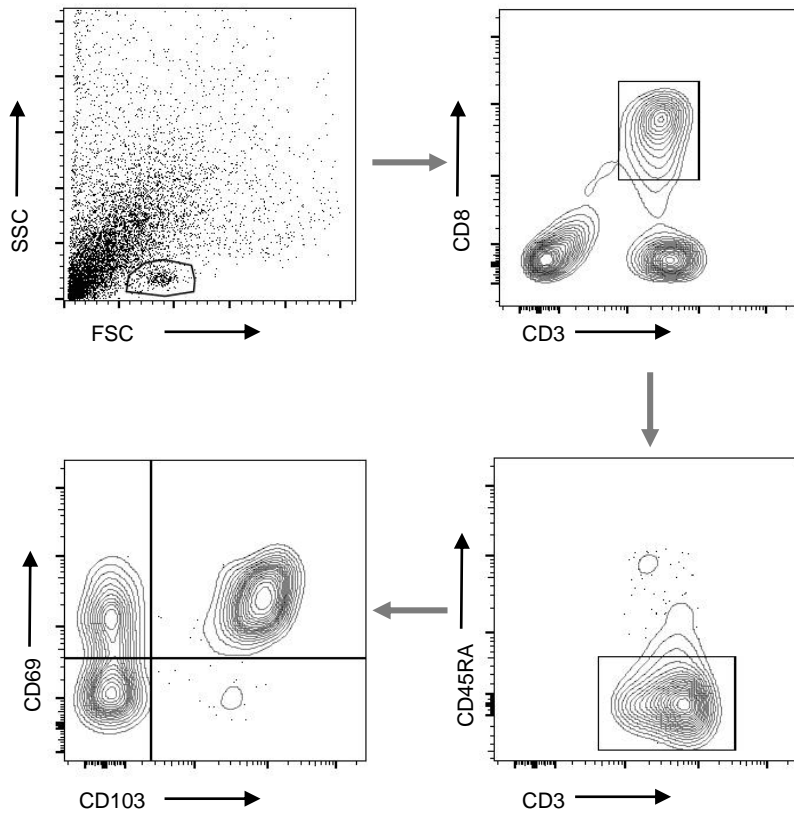

Supplemental Figure 3

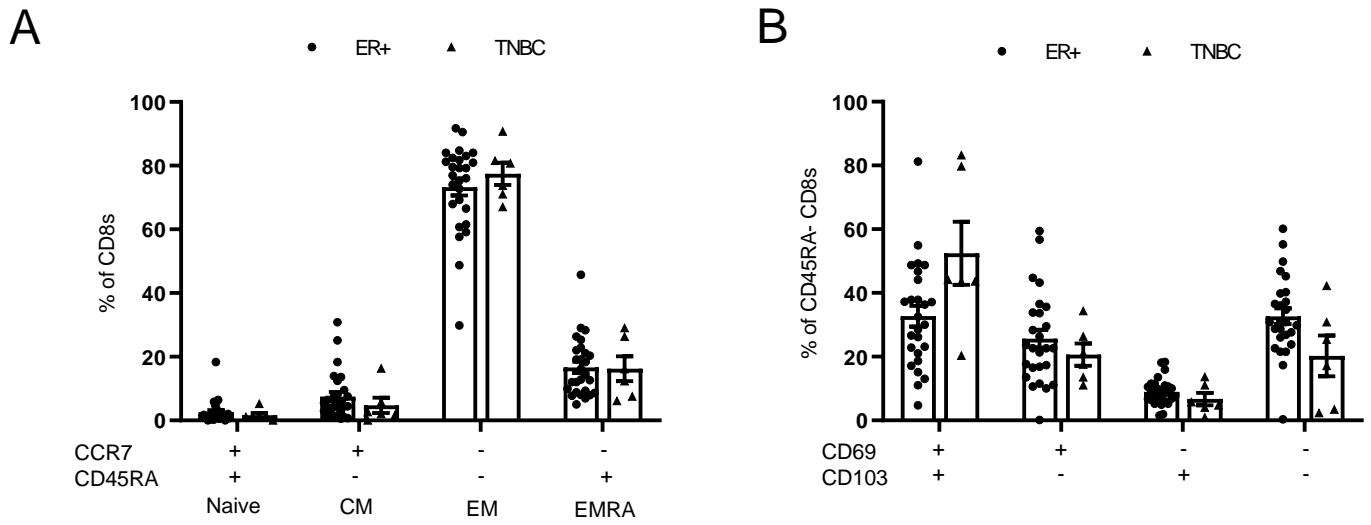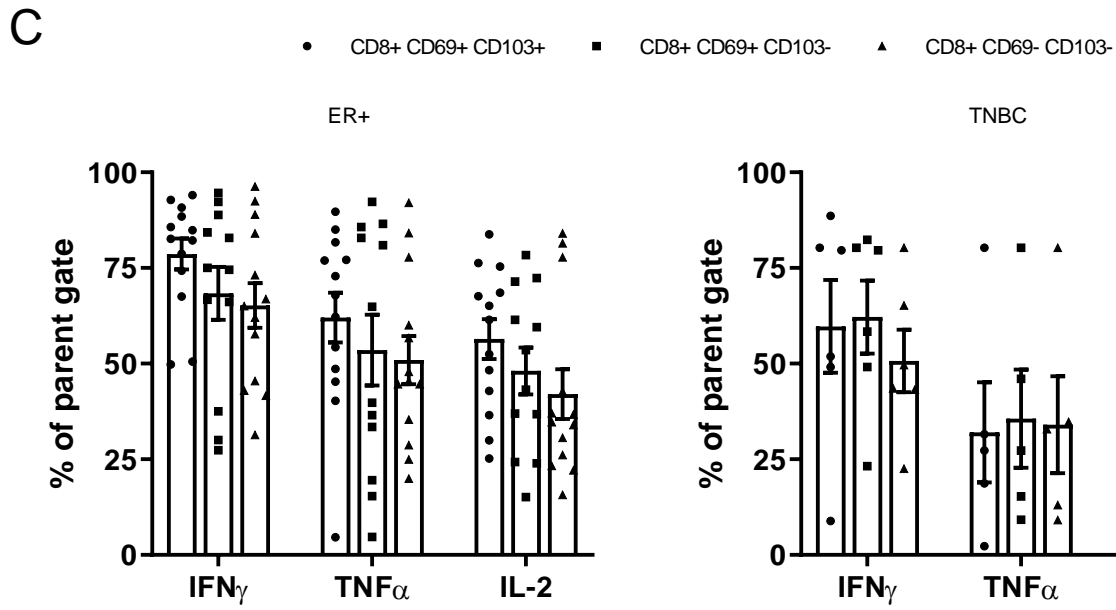

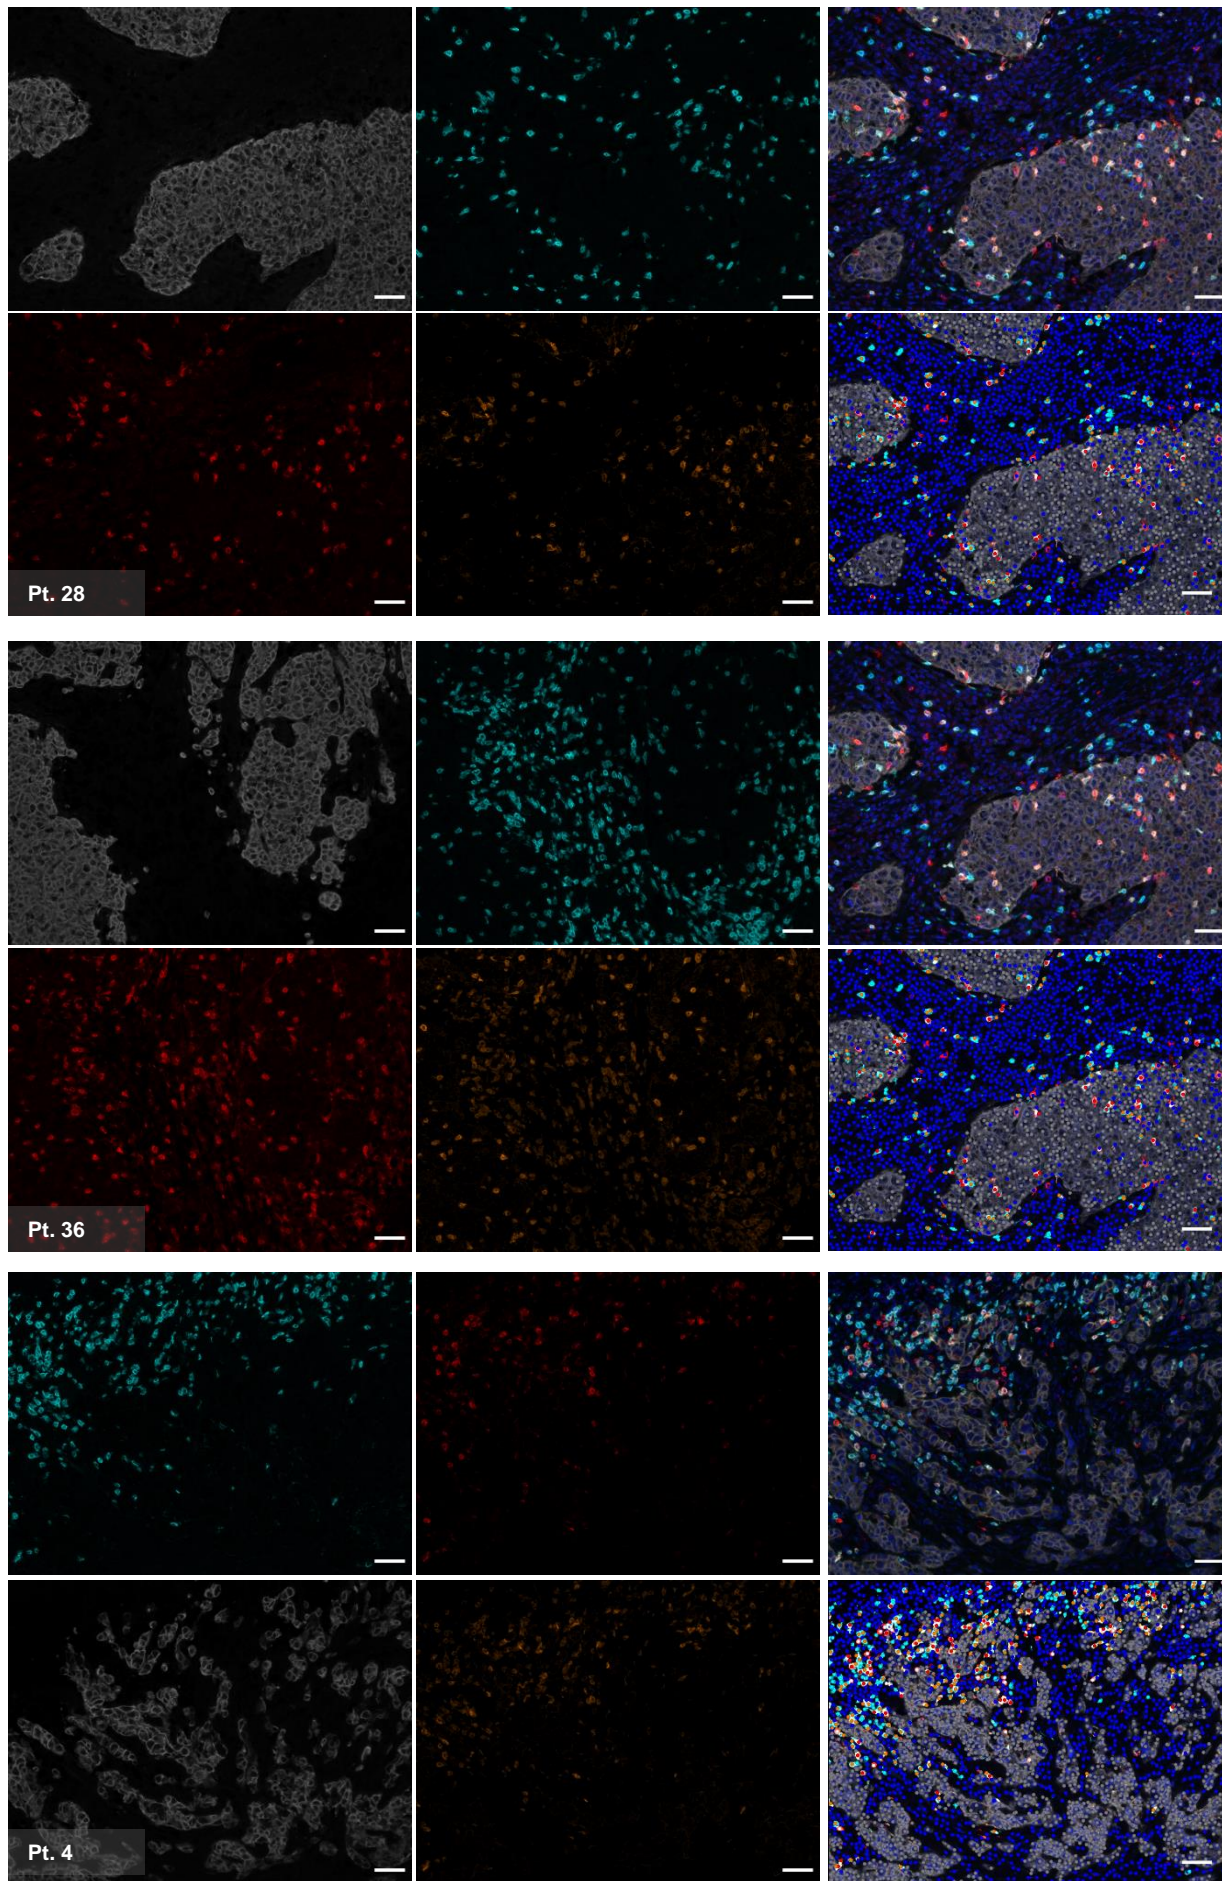

Phenotype: ● CD69+ CD103+ CD8+ ● CD69+ CD103- CD8+ ● CD69- CD103- CD8+ ● CK+

**A**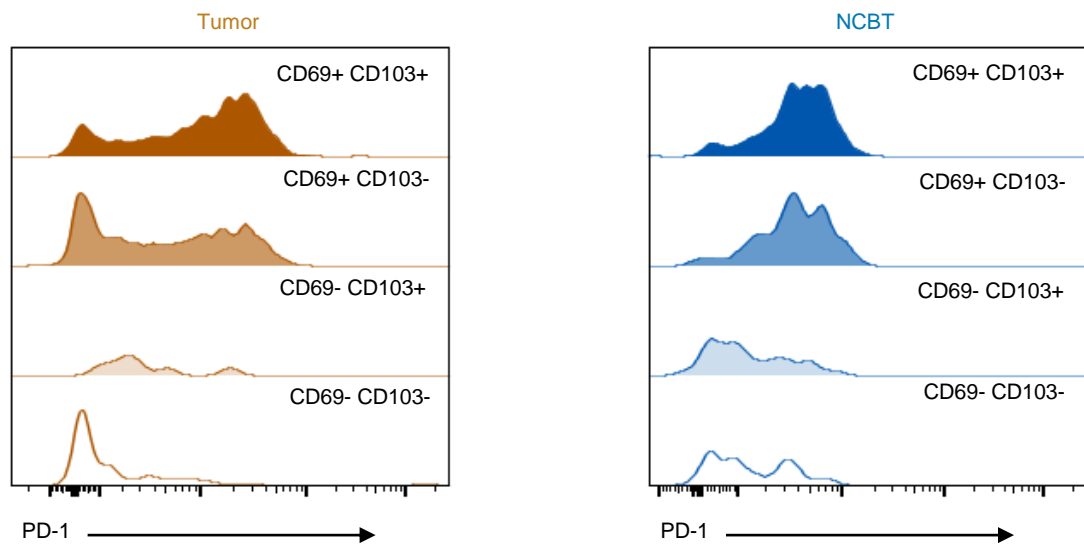**B**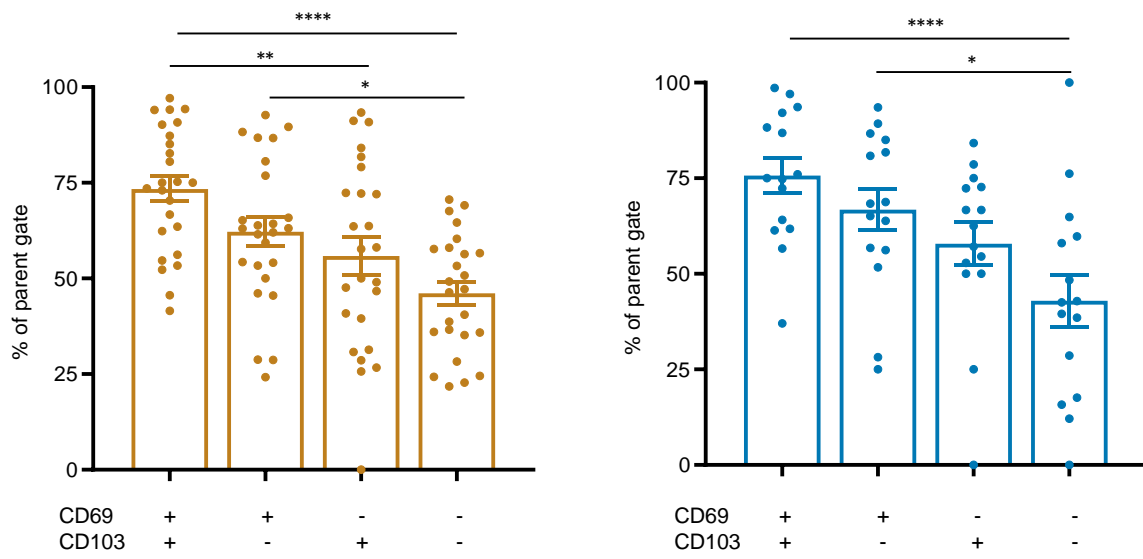

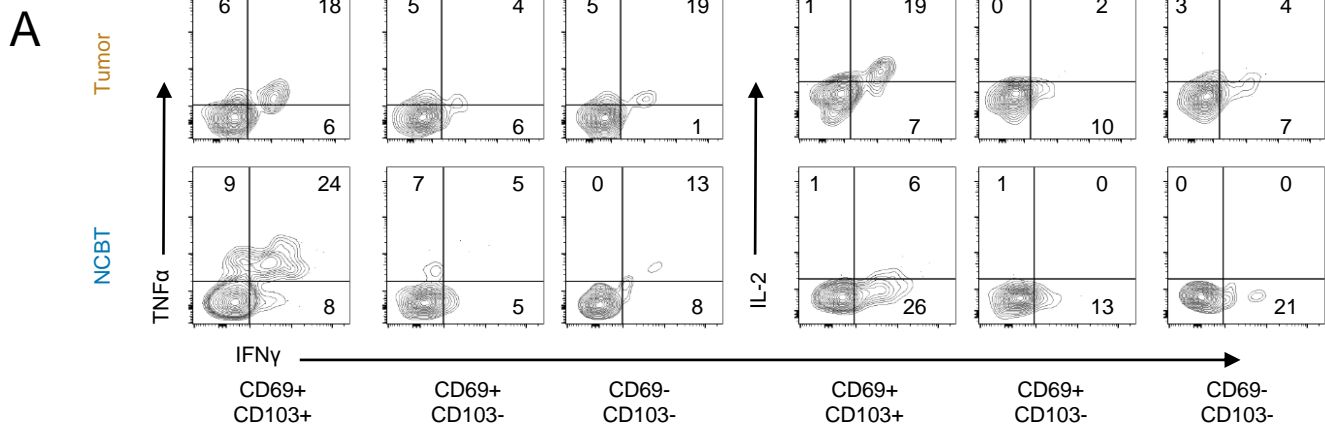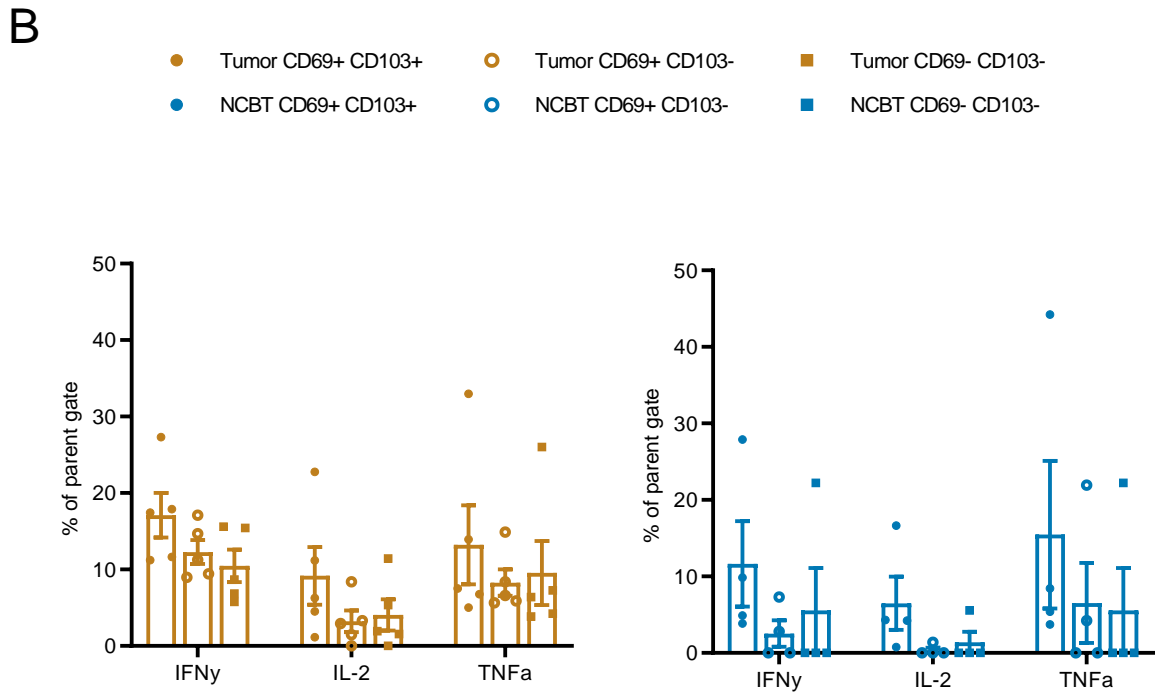

Supplemental Figure 7

Merge: DAPI CD8 CD103 CK

Relapse

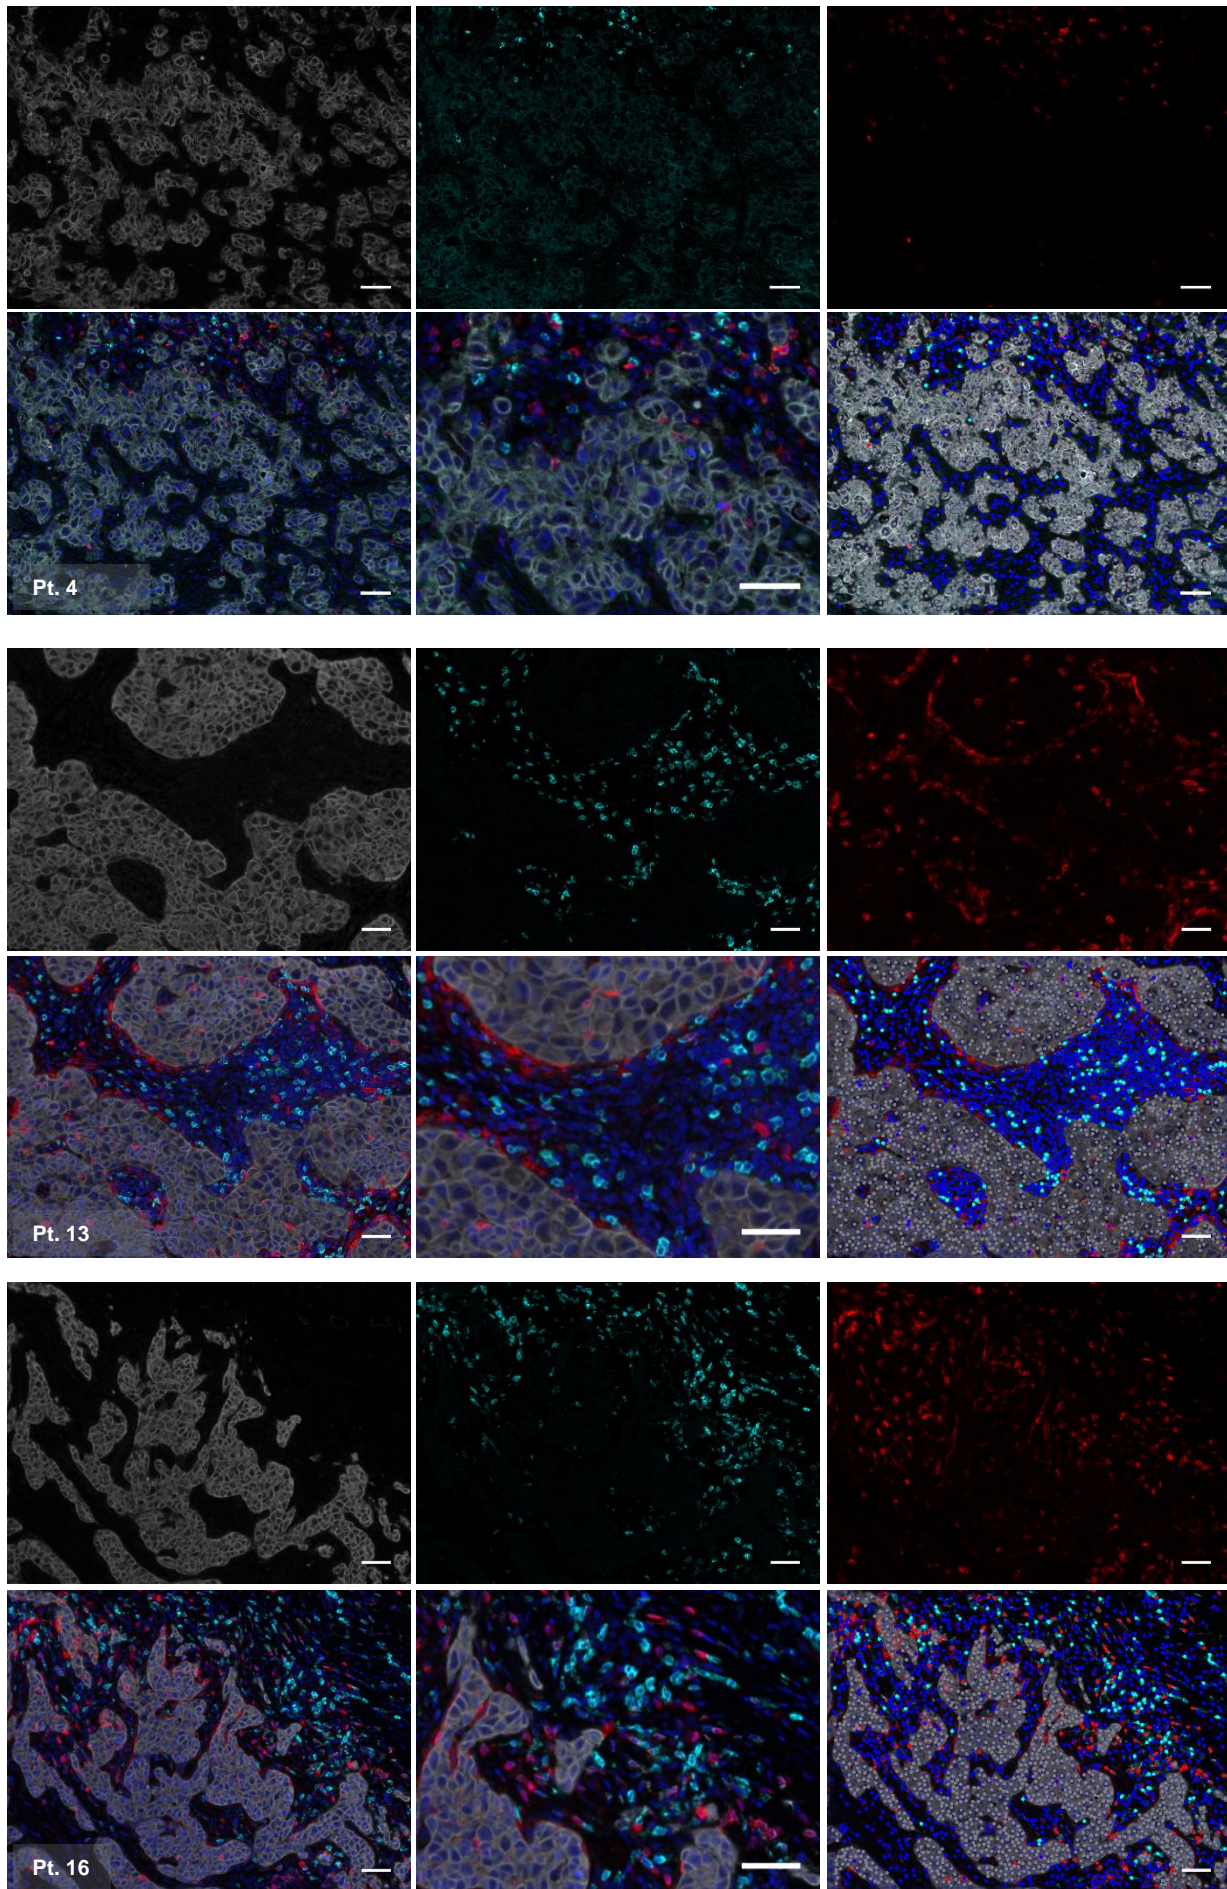

Phenotype: ● CD103+ CD8+ ● CD103- CD8+ ● CK+

Supplemental Figure 8

Merge: DAPI CD8 CD103 CK

Relapse-free

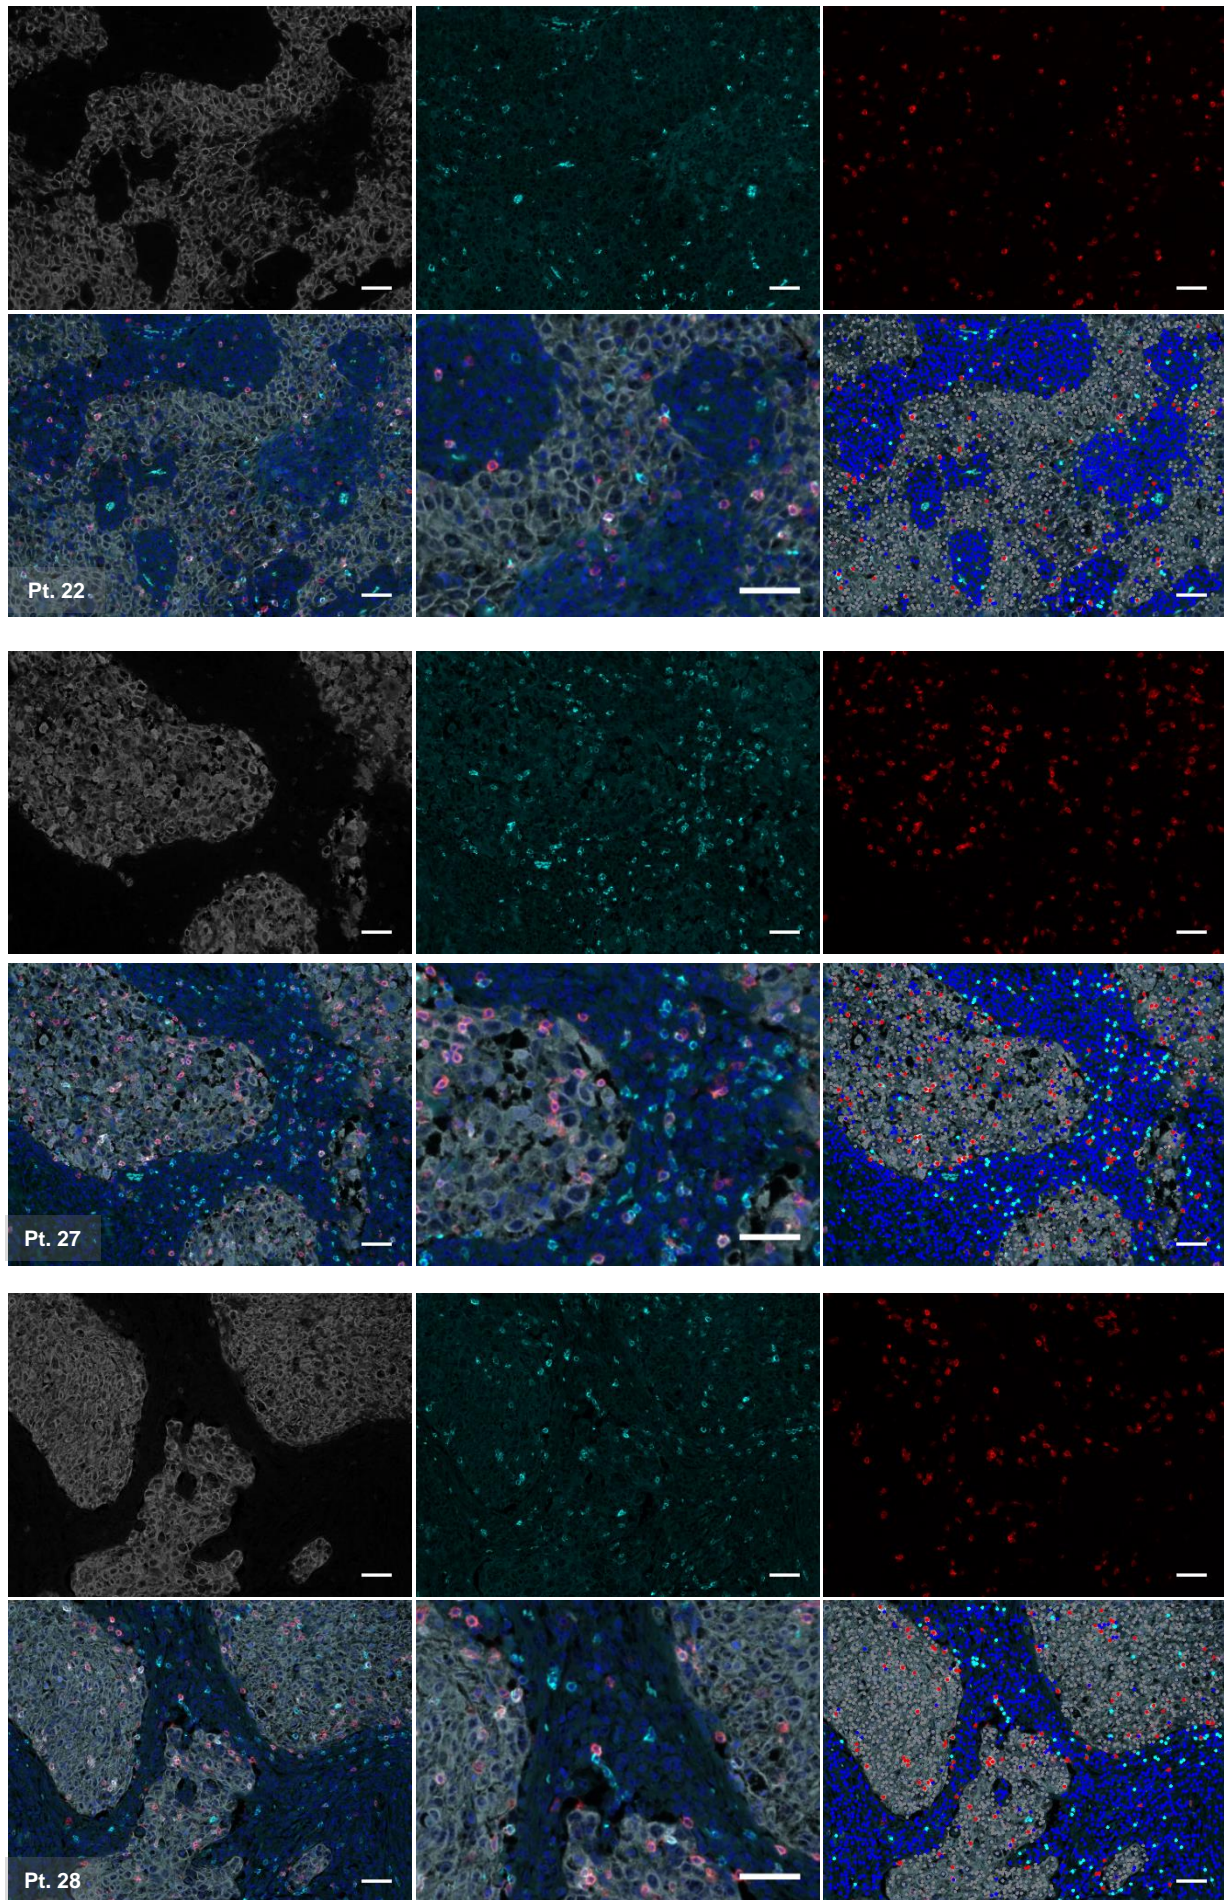

Phenotype: ● CD103+ CD8+ ● CD103- CD8+ ● CK+

Supplemental Figure 9

| <b>Prognostic Tumor Tissue Breast Cancer Patient Characteristics</b> |                        |                             |
|----------------------------------------------------------------------|------------------------|-----------------------------|
|                                                                      | <u>Relapse</u><br>n=12 | <u>Relapse-free</u><br>n=13 |
| <b>Age (years)</b>                                                   |                        |                             |
| Mean, Median (Range)                                                 | 56, 54 (35-79)         | 53, 54 (27-67)              |
| Previously Treated                                                   | n=0                    | n=0                         |
| <b>Pathological Subtype</b>                                          |                        |                             |
| ER- PR- HER2- (TNBC)                                                 | n=12                   | n=13                        |
| <b>Overall Stage</b>                                                 |                        |                             |
| I                                                                    | n=6                    | n=1                         |
| II                                                                   | n=5                    | n=10                        |
| III                                                                  | n=1                    | n=2                         |
| <b>Pathologic Tumor Stage</b>                                        |                        |                             |
| T1                                                                   | n=7                    | n=2                         |
| T2                                                                   | n=4                    | n=10                        |
| T3                                                                   | n=1                    | n=1                         |
| <b>Tumor Grade</b>                                                   |                        |                             |
| 2                                                                    | n=0                    | n=2                         |
| 3                                                                    | n=13                   | n=11                        |
| <b>Relapse Free Survival (months)</b>                                |                        |                             |
| Mean, Median (Range)                                                 | 18, 17 (3-38)          | 109, 109 (62-145)           |

Supplemental Table 1. Clinical characteristics of triple negative breast cancer patient cohorts used for retrospective analysis.

| <b>Tumor Tissue Breast Cancer Patient Characteristics</b> |                |     |
|-----------------------------------------------------------|----------------|-----|
| <b>Age (years)</b>                                        |                |     |
| Mean, Median (Range)                                      | 56, 55 (31-86) |     |
| <b>Pathological Subtype</b>                               |                |     |
| ER+                                                       | n=36           |     |
| ER- PR- HER2-                                             | n=6            |     |
| <b>Overall Stage</b>                                      | ER+            | ER- |
| I                                                         | n=11           | n=1 |
| II                                                        | n=16           | n=3 |
| III                                                       | n=7            | n=2 |
| Unknown                                                   | n=2            |     |
| <b>Pathologic Tumor Stage</b>                             | ER+            | ER- |
| T1                                                        | n=14           | n=1 |
| T2                                                        | n=15           | n=4 |
| T3                                                        | n=5            | n=0 |
| T4                                                        | n=1            | n=1 |
| Local Recurrence                                          | n=1            |     |
| <b>Tumor Grade</b>                                        | ER+            | ER- |
| 1                                                         | n=3            | n=0 |
| 2                                                         | n=20           | n=1 |
| 3                                                         | n=12           | n=5 |
| Unknown                                                   | n=1            |     |

Supplemental Table 2. Clinical characteristics of breast cancer patient tumor samples for fresh tissue studies.

| <b>Non-cancerous Tissue Patient Characteristics</b> |                |
|-----------------------------------------------------|----------------|
| <b>Age (years)</b>                                  |                |
| Mean, Median (Range)                                | 56, 53 (41-84) |
| <b>Surgical Subtype</b>                             |                |
| Adjacent tissue to tumor*                           | n=15           |
| Contralateral breast tissue*                        | n=6            |
| Prophylactic breast tissue**                        | n=3            |

Supplemental Table 3. Clinical characteristics of non-cancerous breast samples for fresh tissue studies. \*In three patients, both adjacent non-cancerous breast tissue and contralateral non-cancerous breast tissues were analyzed. \*\*Prophylactic mastectomies were due to either BRCA1 or CHEK2 mutations.

**Flow Cytometry**

| <b>Antibody</b> | <b>Clone</b> | <b>Fluorophore</b> | <b>Company</b> |
|-----------------|--------------|--------------------|----------------|
| CCR7            | G043H7       | BV421              | Biologend      |
| CD103           | BER-ACT8     | PE-Cy7             | Biologend      |
| CD3             | UCHT1        | BUV496             | BD Biosciences |
| CD45RA          | HI100        | APC-Cy7            | Biologend      |
| CD69            | FN50         | BV605              | Biologend      |
| CD8             | SK1          | BUV805             | BD Biosciences |
| IFN $\gamma$    | B27          | AF700              | BD Biosciences |
| IL-2            | MQ1-17H12    | FITC               | BD Biosciences |
| PD-1            | EH12.1       | PE                 | BD Biosciences |
| TNF $\alpha$    | MAb11        | BV421              | Biologend      |

**Immunohistochemistry**

| <b>Antibody</b> | <b>Clone</b> | <b>pH</b> | <b>Company</b> |
|-----------------|--------------|-----------|----------------|
| CD8             | SP16         | 6         | BioCare        |
| CD103           | EPR4166(2)   | 9         | AbCam          |
| CD69            | CH11         | 9         | Leica          |
| pan-CK          | AE1/AE3      | 6         | Agilent        |

**Real Time PCR Primers**

| <b>Gene</b> | <b>Forward</b>              | <b>Reverse</b>                | <b>Company</b> |
|-------------|-----------------------------|-------------------------------|----------------|
| Actin       | ACC TTC TAC AAT GAG CTG CG  | CCT GGA TAG CAA CGT ACA TGG   | IDT            |
| ITGAE       | CGC TTT CAA TGT GGA TGT GG  | CTG GTG TCC TCT TGG TTC TG    | IDT            |
| S1PR1       | GGG AAG GGA GTA TGT TTG TGG | AGG AAG AGG CGG AAG TTA TTG   | IDT            |
| ITGA1       | AAT TCT CCA GAC GCT CAG TG  | CTC CTT CTC TGT TCC CAT GTA C | IDT            |
| CD244       | TCT AAG CGC ACT GTT CCT TG  | CCT GCT CGT GAT TTC TCC TG    | IDT            |
| XCL1        | TAC ATT GTG GAA GGT GTA GG  | TGG TGT AGG TCT TGA TTC TG    | Sigma Aldrich  |

Supplemental Table 4. Reagents used for flow cytometry, immunohistochemistry and Real Time PCR.
